# Supplementary material for: Vanillin Inhibits Translation and Induces Messenger Ribonucleoprotein (mRNP) Granule Formation in Saccharomyces cerevisiae: Application and Validation of High-Content, Image-Based Profiling
Source: PLoS One. 2013 Apr 24;8(4):e61748. doi: 10.1371/journal.pone.0061748 (PMC3634847; doi:10.1371/journal.pone.0061748)
Supplement: Table S2 — List of parameters detected by Jonckheere-Terpstra test at P<0.01. (XLS) [file pone.0061748.s006.xls]

## Sheet: Table S2
Table S2. List of parameters detected by Jonckheere-Terpstra test at P < 0.01.
ID	Dose-response treatment					Time-Course treatment					Description
	Za	Pb	Qc	FPd	Significante	Za	Pb	Qc	FPd	Significante
D127_A	-2.88932	0.00386078	0.085	1.445	*	-4.64178	3.45428e-06	0	0	*	Distance_between_nuclear_brightest_point_and_cell_tip
C103_A	-3.02216	0.00250977	0.085	0.85	*	-4.60551	4.11452e-06	0	0	*	Long_axis_length_in_whole_cell
C128_A1B	-3.02216	0.00250977	0.085	0.85	*	-4.24287	2.20676e-05	4e-05	0.002	*	Distance_between_middle_point_of_neck_and_mother_hip
C109_A1B	-2.75648	0.00584278	0.103273	2.272	*	-4.09782	4.17064e-05	5.26316e-05	0.003	*	Neck_width
C12-1_A	-2.95574	0.0031192	0.085	1.105	*	-3.95276	7.72542e-05	8.57143e-05	0.006	*	Whole_cell_outline_length
C128_C	-2.62363	0.00869972	0.128286	3.592	*	-3.95276	7.72542e-05	8.57143e-05	0.006	*	Distance_between_middle_point_of_neck_and_mother_hip
C104_A1B	-2.88932	0.00386078	0.085	1.445	*	-3.9165	8.98445e-05	0.000105263	0.00778947	*	Short_axis_length_in_mother
C101_A1B	-2.69006	0.00714402	0.110115	2.863	*	-3.69892	0.000216523	0.000526882	0.049	*	Whole_cell_size
C11-1_A	-2.88932	0.00386078	0.085	1.445	*	-3.62639	0.000287414	0.000683673	0.067	*	Whole_cell_size
D106_C	2.75648	0.00584278	0.103273	2.272	*	-3.48133	0.000498927	0.00133019	0.141	*	Ratio_of_D103_to_C103
C104_A	-2.88932	0.00386078	0.085	1.445	*	-3.30001	0.000966805	0.00269106	0.331	*	Short_axis_length_in_whole_cell
C13_A	3.55353	0.000380098	0.0762	0.0762	*	3.11869	0.00181655	0.00504317	0.701	*	Whole_cell_fitness_for_ellipse
D112_C	-3.155	0.00160496	0.085	0.51	*	3.08243	0.00205319	0.00551034	0.799	*	Ratio_of_D108_to_C128
D130_C	-3.35427	0.000795757	0.0762	0.1524	*	1.63187	0.102706	0.180853	51.543		Distance_between_nuclear_brightest_point_in_mother_and_middle_point_of_neck
CCV115_A1B	3.28785	0.00100957	0.0762	0.2286	*	0.326375	0.744141	0.825212	372.996		Coefficient_of_variation_of_C115_A1B
D108_C	-3.22142	0.00127555	0.0762	0.381	*	1.59561	0.110576	0.193564	55.553		Distance_between_nuclear_gravity_center_in_mother_and_middle_point_of_neck
D194_A	3.22142	0.00127555	0.0762	0.381	*	2.06704	0.0387303	0.0818707	18.994		Maximal_intensity_of_nuclear_brightness_divided_by_average
D116_C	-3.08858	0.00201114	0.085	0.68	*	1.81319	0.069802	0.13197	34.84		Distance_between_two_nuclear_gravity_centers_through_middle_point_of_neck
D134_C	-3.08858	0.00201114	0.085	0.68	*	1.3055	0.191723	0.308314	97.119		Distance_between_two_nuclear_brightest_points_through_middle_point_of_neck
DCV155_A	-2.95574	0.0031192	0.085	1.105	*	0.181319	0.856117	0.909488	429.279		Coefficient_of_variation_of_D155_A
DCV196_A1B	-2.95574	0.0031192	0.085	1.105	*	1.23297	0.217586	0.333157	110.275		Coefficient_of_variation_of_D196_A1B
C109_C	-2.75648	0.00584278	0.103273	2.272	*	-1.52308	0.127738	0.220307	64.3297		Neck_width
D143_C	-2.75648	0.00584278	0.103273	2.272	*	0.797805	0.424984	0.553113	214.608		Distance_between_nuclear_outline_point_D6-1_in_mother_and_middle_point_of_neck
D196_C	2.75648	0.00584278	0.103273	2.272	*	0.0362639	0.971072	0.980359	486.258		Maximal_intensity_of_nuclear_brightness_divided_by_average_in_whole_cell
C115_A1B	2.69006	0.00714402	0.110115	2.863	*	-1.88572	0.0593325	0.116807	29.669		Mother_axis_ratio
D183_C	-2.69006	0.00714402	0.110115	2.863	*	2.32089	0.0202929	0.0473805	9.713		Nuclear_axis_ratio_in_bud
D196_A1B	2.69006	0.00714402	0.110115	2.863	*	0.906597	0.36462	0.491285	184.232		Maximal_intensity_of_nuclear_brightness_divided_by_average
A122_A1B	-2.62363	0.00869972	0.128286	3.592	*	0.797805	0.424984	0.553113	214.608		Number_of_bright_actin_patches
D117_A	-0.631001	0.52804	0.834517	264.542		-5.76596	8.11963e-09	0	0	*	Distance_between_nuclear_gravity_center_and_cell_center
CCV112_A1B	-0.0996317	0.920637	0.955143	456.558		5.65716	1.53895e-08	0	0	*	Coefficient_of_variation_of_C112_A1B
CCV12-1_A1B	0.697422	0.485539	0.818614	243.947		5.65716	1.53895e-08	0	0	*	Coefficient_of_variation_of_C12-1_A1B
D147_A	0.0332106	0.973507	0.998273	498.138		-5.6209	1.89965e-08	0	0	*	Relative_distance_of_nuclear_gravity_center_to_cell_center
CCV128_A1B	-0.0332106	0.973507	0.998273	498.138		5.51211	3.5456e-08	0	0	*	Coefficient_of_variation_of_C128_A1B
CCV11-1_A1B	0.564579	0.57236	0.850735	286.698		5.40332	6.54197e-08	0	0	*	Coefficient_of_variation_of_C11-1_A1B
D118_A1B	-1.36163	0.173314	0.554166	87.004		-5.40332	6.54197e-08	0	0	*	Distance_between_nuclear_gravity_center_and_mother_center
D145_A1B	-0.564579	0.57236	0.850735	286.698		-5.40332	6.54197e-08	0	0	*	Distance_between_nuclear_outline_point_D7_and_mother_hip
A108	-1.22879	0.21915	0.617464	110.526		5.36705	8.00334e-08	0	0	*	actin_d_iso_ratio
D102_A	-2.29153	0.0219329	0.179161	10.033		-5.33079	9.77868e-08	0	0	*	Distance_between_nuclear_gravity_center_and_mother_tip
CCV101_A1B	0.697422	0.485539	0.818614	243.947		5.29453	1.19326e-07	0	0	*	Coefficient_of_variation_of_C101_A1B
A117	-0.963106	0.335494	0.712688	168.907		5.222	1.77003e-07	0	0	*	actin_d_iso_ratio_to_budded_cells
D105_A	-0.0996317	0.920637	0.955143	456.558		-5.18573	2.15166e-07	0	0	*	Ratio_of_D102_to_C103
CCV104_A1B	0.365316	0.714875	0.892416	356.967		5.07694	3.83557e-07	0	0	*	Coefficient_of_variation_of_C104_A1B
DCV105_A	-0.498158	0.618372	0.852066	310.152		-5.04068	4.63885e-07	0	0	*	Coefficient_of_variation_of_D105_A
A102_A1B	0.431737	0.665932	0.868426	333.476		5.00441	5.60321e-07	0	0	*	Bud_actin_region_ratio_to_total_region
D104_A1B	-1.95942	0.0500633	0.299358	24.248		-4.96815	6.75945e-07	0	0	*	Distance_between_nuclear_gravity_center_and_mother_tip
D126_A1B	-1.893	0.0583576	0.320888	28.2381		-4.96815	6.75945e-07	0	0	*	Distance_between_nuclear_gravity_center_and_mother_hip
A7-1_A1B	-0.498158	0.618372	0.852066	310.152		-4.89562	9.79948e-07	0	0	*	Size_of_actin_region_in_mother
A8-1_A1B	-1.09595	0.273101	0.655257	137.604		-4.85936	1.17766e-06	0	0	*	Total_brightness_of_actin_region_in_mother
CCV103_A1B	1.49448	0.135051	0.484094	67.289		4.85936	1.17766e-06	0	0	*	Coefficient_of_variation_of_C103_A1B
D142_A1B	-1.82658	0.0677628	0.34234	33.207		-4.85936	1.17766e-06	0	0	*	Distance_between_nuclear_brightest_point_and_mother_hip
D147_A1B	0.365316	0.714875	0.892416	356.967		-4.85936	1.17766e-06	0	0	*	Relative_distance_of_nuclear_gravity_center_to_mother_center
CCV11-1_C	-1.09595	0.273101	0.655257	137.604		4.8231	1.41348e-06	0	0	*	Coefficient_of_variation_of_C11-1_C
C13_A1B	2.42437	0.0153349	0.149174	6.862		4.78683	1.69435e-06	0	0	*	Mother_cell_fitness_for_ellipse
D135_A	-1.36163	0.173314	0.554166	87.004		-4.78683	1.69435e-06	0	0	*	Distance_between_nuclear_brightest_point_and_cell_center
CCV102_A1B	0.564579	0.57236	0.850735	286.698		4.75057	2.02847e-06	0	0	*	Coefficient_of_variation_of_C102_A1B
D129_A1B	-1.69374	0.090315	0.378331	44.643		-4.7143	2.42539e-06	0	0	*	Distance_between_nuclear_brightest_point_and_mother_tip
A108_A1B	0.531616	0.594992	0.850735	287.548		4.69684	2.64221e-06	0	0	*	Actin_d_iso_ratio
D117_C	-1.82658	0.0677628	0.34234	33.207		-4.67804	2.89631e-06	0	0	*	Distance_between_nuclear_gravity_center_in_mother_and_mother_center
D136_A1B	-1.36163	0.173314	0.554166	87.004		-4.67804	2.89631e-06	0	0	*	Distance_between_nuclear_brightest_point_and_mother_center
ACV102_A1B	-0.498158	0.618372	0.852066	310.152		-4.64178	3.45428e-06	0	0	*	Coefficient_of_variation_of_A102_A1B
ACV123_A	1.02953	0.303232	0.700784	152.771		-4.64178	3.45428e-06	0	0	*	Coefficient_of_variation_of_A123_A
A109_A1B	-1.29521	0.195247	0.582006	98.359		-4.60616	4.10164e-06	0	0	*	Actin_e_ratio
A7-1_A	0.298895	0.76502	0.906338	382.475		-4.56925	4.89477e-06	0	0	*	Size_of_actin_region
D148_A	-0.0996317	0.920637	0.955143	456.558		-4.56925	4.89477e-06	0	0	*	Relative_distance_of_nuclear_brightest_point_to_cell_center
A121_A	-2.29153	0.0219329	0.179161	10.033		-4.53298	5.81562e-06	2.32558e-05	0.000906977	*	Maximal_distance_between_patches
D103_C	0.963106	0.335494	0.712688	168.907		-4.49672	6.90097e-06	2.32558e-05	0.000930233	*	Distance_between_nuclear_gravity_center_in_mother_and_mother_tip
CCV103_C	-0.0332106	0.973507	0.998273	498.138		4.46046	8.17853e-06	2.32558e-05	0.000976744	*	Coefficient_of_variation_of_C103_C
D145_C	1.69374	0.090315	0.378331	44.643		-4.46046	8.17853e-06	2.32558e-05	0.000976744	*	Distance_between_nuclear_outline_point_D7_in_mother_and_mother_hip
D148_A1B	0.963106	0.335494	0.712688	168.907		-4.42419	9.68037e-06	2.32558e-05	0.001	*	Relative_distance_of_nuclear_brightest_point_to_mother_center
A120_A	-2.22511	0.026074	0.2013	12.078		-4.38793	1.14435e-05	4e-05	0.0018	*	Total_length_of_actin_patch_link
D125_C	2.35795	0.0183762	0.177043	8.321		-4.38793	1.14435e-05	4e-05	0.0018	*	Distance_between_nuclear_gravity_center_in_mother_and_mother_hip
C112_C	-1.76016	0.0783808	0.363925	38.5761		-4.35166	1.35108e-05	4e-05	0.00184	*	Distance_between_middle_point_of_neck_and_mother_center
CCV112_C	-0.564579	0.57236	0.850735	286.698		4.3154	1.59314e-05	4e-05	0.00192	*	Coefficient_of_variation_of_C112_C
DCV132_A1B	0.564579	0.57236	0.850735	286.698		-4.3154	1.59314e-05	4e-05	0.00192	*	Coefficient_of_variation_of_D132_A1B
CCV12-1_C	-1.5609	0.118548	0.433132	58.906		4.24287	2.20676e-05	4e-05	0.002	*	Coefficient_of_variation_of_C12-1_C
ACV123_A1B	2.22511	0.026074	0.2013	12.078		-4.17035	3.04138e-05	5.26316e-05	0.00284211	*	Coefficient_of_variation_of_A123_A1B
C103_A1B	-2.22511	0.026074	0.2013	12.078		-4.17035	3.04138e-05	5.26316e-05	0.00284211	*	Long_axis_length_in_mother
C112_A1B	-2.42437	0.0153349	0.149174	6.862		-4.17035	3.04138e-05	5.26316e-05	0.00284211	*	Distance_between_middle_point_of_neck_and_mother_center
D128_C	1.29521	0.195247	0.582006	98.359		-4.17035	3.04138e-05	5.26316e-05	0.00284211	*	Distance_between_nuclear_brightest_point_in_mother_and_mother_tip
CCV128_C	0.631001	0.52804	0.834517	264.542		4.13408	3.56377e-05	5.26316e-05	0.00289474	*	Coefficient_of_variation_of_C128_C
D147_C	-1.95942	0.0500633	0.299358	24.248		-4.09782	4.17064e-05	5.26316e-05	0.003	*	Relative_distance_of_nuclear_gravity_center_in_mother_to_mother_center
A104_C	-0.564579	0.57236	0.850735	286.698		4.06155	4.87472e-05	6.66667e-05	0.00386667	*	Relative_distance_of_actin_patch_center_from_neck_in_bud
A123_A	-1.09595	0.273101	0.655257	137.604		4.02529	5.69052e-05	6.66667e-05	0.004	*	Ratio_of_actin_patches_to_actin_region
DCV179_C	0.830264	0.40639	0.789521	204.486		4.02529	5.69052e-05	6.66667e-05	0.004	*	Coefficient_of_variation_of_D179_C
A8-1_A	-1.22879	0.21915	0.617464	110.526		-3.98903	6.63451e-05	8.57143e-05	0.00548571	*	Actin_region_brightness
ACV8-2_A1B	-0.631001	0.52804	0.834517	264.542		-3.98903	6.63451e-05	8.57143e-05	0.00548571	*	Coefficient_of_variation_of_A8-2_A1B
D170_C	2.29153	0.0219329	0.179161	10.033		-3.98903	6.63451e-05	8.57143e-05	0.00548571	*	Angle_between_C4-1D2-1_and_C4-1C1
D202	-0.166053	0.868115	0.950268	433.322		3.98903	6.63451e-05	8.57143e-05	0.00548571	*	nuclear_C_ratio
C122	-0.166053	0.868115	0.950268	433.322		3.97146	7.14344e-05	8.57143e-05	0.00557143	*	large_bud_ratio
A101_A	0.830264	0.40639	0.789521	204.486		-3.95276	7.72542e-05	8.57143e-05	0.006	*	Actin_region_ratio_in_whole_cell
C11-1_A1B	-2.55721	0.0105515	0.135152	4.46		-3.95276	7.72542e-05	8.57143e-05	0.006	*	Mother_cell_size
C12-1_A1B	-2.49079	0.0127459	0.148676	5.501		-3.95276	7.72542e-05	8.57143e-05	0.006	*	Mother_cell_outline_length
A101_A1B	0.298895	0.76502	0.906338	382.475		-3.9165	8.98445e-05	0.000105263	0.00778947	*	Actin_region_ratio_in_whole_cell
CCV104_C	-1.42805	0.153276	0.524646	76.0737		3.9165	8.98445e-05	0.000105263	0.00778947	*	Coefficient_of_variation_of_C104_C
D169_C	0.763843	0.444961	0.813196	222.816		-3.9165	8.98445e-05	0.000105263	0.00778947	*	Angle_between_C4-1D1-1_and_C4-1C1
A112_A1B	0.631001	0.52804	0.834517	264.542		3.88133	0.000103885	0.000105263	0.008	*	Actin_cd_ratio
C125_A1B	1.09595	0.273101	0.655257	137.604		3.88133	0.000103885	0.000105263	0.008	*	Large_bud_ratio
A114	0.697422	0.485539	0.818614	243.947		-3.88023	0.000104356	0.000126582	0.01	*	actin_a_ratio_to_no_bud_cells
ACV101_A	0.298895	0.76502	0.906338	382.475		3.88023	0.000104356	0.000126582	0.01	*	Coefficient_of_variation_of_A101_A
C103_C	-1.09595	0.273101	0.655257	137.604		-3.88023	0.000104356	0.000126582	0.01	*	Long_axis_length_in_mother
A112	-0.564579	0.57236	0.850735	286.698		3.84397	0.00012106	0.000195122	0.016	*	actin_bcd_ratio
A115	-0.697422	0.485539	0.818614	243.947		3.84397	0.00012106	0.000195122	0.016	*	actin_b_ratio_to_no_bud_cells
DCV141_C	-1.09595	0.273101	0.655257	137.604		3.84397	0.00012106	0.000195122	0.016	*	Coefficient_of_variation_of_D141_C
ACV101_C	1.69374	0.090315	0.378331	44.643		-3.80771	0.000140262	0.000301205	0.025	*	Coefficient_of_variation_of_A101_C
A111	0.631001	0.52804	0.834517	264.542		-3.77144	0.000162306	0.000404762	0.034	*	actin_ae_ratio
A105_A	0.763843	0.444961	0.813196	222.816		-3.75384	0.000174144	0.000411765	0.035	*	Actin_a_ratio
CCV101_C	-0.166053	0.868115	0.950268	433.322		3.73518	0.000187582	0.000477273	0.042	*	Coefficient_of_variation_of_C101_C
D169_A1B	0.0332106	0.973507	0.998273	498.138		-3.73518	0.000187582	0.000477273	0.042	*	Angle_between_C4-1D1-1_and_C4-1C1
DCV114_A1B	-0.564579	0.57236	0.850735	286.698		-3.73518	0.000187582	0.000477273	0.042	*	Coefficient_of_variation_of_D114_A1B
A106_A	-0.830264	0.40639	0.789521	204.486		3.69892	0.000216523	0.000526882	0.049	*	Actin_b_ratio
D199	0.498158	0.618372	0.852066	310.152		-3.69892	0.000216523	0.000526882	0.049	*	nuclear_A_ratio
D213	-0.0996317	0.920637	0.955143	456.558		3.69892	0.000216523	0.000526882	0.049	*	nuclear_C_ratio_to_nuclear_AA1BC_cells
DCV14-1_C	0.697422	0.485539	0.818614	243.947		3.69892	0.000216523	0.000526882	0.049	*	Coefficient_of_variation_of_D14-1_C
ACV101_A1B	1.62732	0.10367	0.400481	50.861		-3.66265	0.000249618	0.000621053	0.059	*	Coefficient_of_variation_of_A101_A1B
C125	0.896685	0.369887	0.753657	186.153		3.66265	0.000249618	0.000621053	0.059	*	large_bud_ratio_to_buded_cells
A105	0.598068	0.549795	0.834517	266.211		-3.62639	0.000287414	0.000683673	0.067	*	actin_a_ratio
C12-1_C	-1.49448	0.135051	0.484094	67.289		-3.62639	0.000287414	0.000683673	0.067	*	Mother_cell_outline_length
C11-1_C	-1.893	0.0583576	0.320888	28.2381		-3.59012	0.000330521	0.000787879	0.078	*	Mother_cell_size
D210	0.763843	0.444961	0.813196	222.816		-3.5725	0.000353592	0.00079	0.079	*	nuclear_A_ratio_to_nuclear_AA1BC_cells
C119	0.697422	0.485539	0.818614	243.947		-3.55386	0.000379622	0.000980392	0.1	*	no_bud_ratio
CCV11-1_A	1.69374	0.090315	0.378331	44.643		3.55386	0.000379622	0.000980392	0.1	*	Coefficient_of_variation_of_C11-1_A
A119	0.398712	0.690105	0.868426	334.344		-3.5176	0.000435475	0.00114423	0.119	*	actin_f_ratio_to_budded_cells
C13_C	2.55721	0.0105515	0.135152	4.46		3.5176	0.000435475	0.00114423	0.119	*	Mother_cell_fitness_for_ellipse
D141_C	2.55721	0.0105515	0.135152	4.46		-3.48133	0.000498927	0.00133019	0.141	*	Distance_between_nuclear_brightest_point_in_mother_and_mother_hip
ACV123_C	1.09595	0.273101	0.655257	137.604		-3.44507	0.000570916	0.00160185	0.173	*	Coefficient_of_variation_of_A123_C
D114_A1B	0.298895	0.76502	0.906338	382.475		3.44507	0.000570916	0.00160185	0.173	*	Ratio_of_D110_to_C128
D154_C	-1.02953	0.303232	0.700784	152.771		3.4088	0.000652483	0.00185586	0.206	*	Angle_between_C1D1-1_and_C1C1-2
D17-1_C	-0.631001	0.52804	0.834517	264.542		3.4088	0.000652483	0.00185586	0.206	*	Nuclear_fitness_for_ellipse_in_mother
DCV14-3_C	0.498158	0.618372	0.852066	310.152		3.4088	0.000652483	0.00185586	0.206	*	Coefficient_of_variation_of_D14-3_C
CCV108_A1B	0.0332106	0.973507	0.998273	498.138		3.37254	0.000744782	0.00217544	0.245825	*	Coefficient_of_variation_of_C108_A1B
D170_A1B	-0.0996317	0.920637	0.955143	456.558		-3.37254	0.000744782	0.00217544	0.245825	*	Angle_between_C4-1D2-1_and_C4-1C1
A112_C	-1.69453	0.0901655	0.363925	38.94		3.33853	0.000842229	0.00217544	0.248	*	Actin_cd_ratio
A7-1_C	0.896685	0.369887	0.753657	186.153		-3.33628	0.000849087	0.00236134	0.281	*	Size_of_actin_region_in_mother
ACV121_A1B	1.893	0.0583576	0.320888	28.2381		-3.33628	0.000849087	0.00236134	0.281	*	Coefficient_of_variation_of_A121_A1B
C102_A1B	-2.02584	0.0427808	0.273693	20.527		-3.33628	0.000849087	0.00236134	0.281	*	Whole_cell_outline_length
CCV103_A	2.49079	0.0127459	0.148676	5.501		3.33628	0.000849087	0.00236134	0.281	*	Coefficient_of_variation_of_C103_A
DCV107_A1B	-1.62732	0.10367	0.400481	50.861		-3.33628	0.000849087	0.00236134	0.281	*	Coefficient_of_variation_of_D107_A1B
A123_A1B	-0.232474	0.81617	0.926712	406.827		3.30001	0.000966805	0.00269106	0.331	*	Ratio_of_actin_patches_to_actin_region
ACV120_A1B	1.5609	0.118548	0.433132	58.906		-3.30001	0.000966805	0.00269106	0.331	*	Coefficient_of_variation_of_A120_A1B
C101_C	-1.62732	0.10367	0.400481	50.861		-3.30001	0.000966805	0.00269106	0.331	*	Whole_cell_size
C102_C	-1.22879	0.21915	0.617464	110.526		-3.26375	0.00109949	0.003152	0.394	*	Whole_cell_outline_length
CCV12-1_A	1.95942	0.0500633	0.299358	24.248		3.26375	0.00109949	0.003152	0.394	*	Coefficient_of_variation_of_C12-1_A
ACV7-1_A	0.963106	0.335494	0.712688	168.907		3.22748	0.00124884	0.00369048	0.465	*	Coefficient_of_variation_of_A7-1_A
ACV9_C	1.82658	0.0677628	0.34234	33.207		-3.19122	0.00141673	0.00404545	0.529955	*	Coefficient_of_variation_of_A9_C
D200	-0.0996317	0.920637	0.955143	456.558		3.19122	0.00141673	0.00404545	0.529955	*	nuclear_A1_ratio
DCV117_A	-0.631001	0.52804	0.834517	264.542		3.19122	0.00141673	0.00404545	0.529955	*	Coefficient_of_variation_of_D117_A
DCV117_C	0.564579	0.57236	0.850735	286.698		3.19122	0.00141673	0.00404545	0.529955	*	Coefficient_of_variation_of_D117_C
DCV147_C	-0.166053	0.868115	0.950268	433.322		3.19122	0.00141673	0.00404545	0.529955	*	Coefficient_of_variation_of_D147_C
A108_C	-2.06364	0.039052	0.254779	17.325		3.17478	0.00149949	0.00404545	0.534	*	Actin_d_iso_ratio
CCV104_A	1.29521	0.195247	0.582006	98.359		3.15496	0.00160522	0.00448529	0.61	*	Coefficient_of_variation_of_C104_A
D107_A1B	-0.498158	0.618372	0.852066	310.152		-3.15496	0.00160522	0.00448529	0.61	*	Ratio_of_D104_to_C103
D162_C	0.830264	0.40639	0.789521	204.486		-3.15496	0.00160522	0.00448529	0.61	*	Angle_between_D1-1D1-2_and_C1C4-1
DCV125_C	-1.16237	0.245085	0.63481	123.788		3.15496	0.00160522	0.00448529	0.61	*	Coefficient_of_variation_of_D125_C
DCV128_C	-1.69374	0.090315	0.378331	44.643		3.11869	0.00181655	0.00504317	0.701	*	Coefficient_of_variation_of_D128_C
DCV176_C	0.564579	0.57236	0.850735	286.698		3.11869	0.00181655	0.00504317	0.701	*	Coefficient_of_variation_of_D176_C
A103_C	1.36163	0.173314	0.554166	87.004		-3.08243	0.00205319	0.00551034	0.799	*	Relative_distance_of_actin_patch_center_from_neck_in_mother
A104_A1B	1.42805	0.153276	0.524646	76.0737		3.08243	0.00205319	0.00551034	0.799	*	Relative_distance_of_actin_patch_center_from_neck_in_bud
A8-1_C	0.631001	0.52804	0.834517	264.542		-3.08243	0.00205319	0.00551034	0.799	*	Total_brightness_of_actin_region_in_mother
D121_C	-0.498158	0.618372	0.852066	310.152		-3.08243	0.00205319	0.00551034	0.799	*	Distance_between_nuclear_gravity_center_in_bud_and_bud_tip
D152_C	-2.42437	0.0153349	0.149174	6.862		3.08243	0.00205319	0.00551034	0.799	*	Mobility_of_nucleus_in_mother
C104_C	-2.29153	0.0219329	0.179161	10.033		-3.04617	0.0023178	0.00615333	0.923	*	Short_axis_length_in_mother
D173_C	-0.431737	0.665932	0.868426	333.476		3.04617	0.0023178	0.00615333	0.923	*	Maximal_distance_between_nuclear_gravity_center_and_nuclear_outline_in_mother
DCV110_A1B	-1.09595	0.273101	0.655257	137.604		-3.04617	0.0023178	0.00615333	0.923	*	Coefficient_of_variation_of_D110_A1B
DCV145_C	-0.631001	0.52804	0.834517	264.542		3.04617	0.0023178	0.00615333	0.923	*	Coefficient_of_variation_of_D145_C
DCV182_C	0.365316	0.714875	0.892416	356.967		3.04617	0.0023178	0.00615333	0.923	*	Coefficient_of_variation_of_D182_C
ACV122_A1B	-0.298895	0.76502	0.906338	382.475		-3.0099	0.00261332	0.00707237	1.075	*	Coefficient_of_variation_of_A122_A1B
D211	0.0332106	0.973507	0.998273	498.138		3.0099	0.00261332	0.00707237	1.075	*	nuclear_A1_ratio_to_nuclear_AA1BC_cells
D135_C	-2.02584	0.0427808	0.273693	20.527		-2.97364	0.00294292	0.00767722	1.20532	*	Distance_between_nuclear_brightest_point_in_mother_and_mother_center
D163_C	1.22879	0.21915	0.617464	110.526		-2.97364	0.00294292	0.00767722	1.20532	*	Angle_between_D2-1D2-2_and_C1C4-1
DCV15-1_C	0.896685	0.369887	0.753657	186.153		2.97364	0.00294292	0.00767722	1.20532	*	Coefficient_of_variation_of_D15-1_C
DCV173_C	1.02953	0.303232	0.700784	152.771		2.97364	0.00294292	0.00767722	1.20532	*	Coefficient_of_variation_of_D173_C
DCV183_C	-1.16237	0.245085	0.63481	123.788		2.97364	0.00294292	0.00767722	1.20532	*	Coefficient_of_variation_of_D183_C
A110_C	-0.831036	0.405953	0.753657	186.907		-2.95708	0.00310565	0.00767722	1.213	*	Actin_f_ratio
A118	0.697422	0.485539	0.818614	243.947		-2.93737	0.00331005	0.0084939	1.393	*	actin_e_ratio_to_budded_cells
A122_A	-1.82658	0.0677628	0.34234	33.207		-2.93737	0.00331005	0.0084939	1.393	*	Number_of_bright_actin_patches
D123_C	-0.232474	0.81617	0.926712	406.827		-2.93737	0.00331005	0.0084939	1.393	*	Ratio_of_D121_to_C107
D176_C	-0.498158	0.618372	0.852066	310.152		2.93737	0.00331005	0.0084939	1.393	*	Nuclear_long_axis_length_in_mother
D192_C	-0.498158	0.618372	0.852066	310.152		-2.93737	0.00331005	0.0084939	1.393	*	Average_of_nuclear_brightness_in_bud
DCV169_C	0.697422	0.485539	0.818614	243.947		2.93737	0.00331005	0.0084939	1.393	*	Coefficient_of_variation_of_D169_C
A106	-0.431737	0.665932	0.868426	333.476		2.90111	0.00371844	0.00944311	1.577	*	actin_b_ratio
C117_A1B	1.5609	0.118548	0.433132	58.906		2.90111	0.00371844	0.00944311	1.577	*	Cell_outline_ratio
DCV152_A1B	-1.893	0.0583576	0.320888	28.2381		-2.90111	0.00371844	0.00944311	1.577	*	Coefficient_of_variation_of_D152_A1B
DCV151_C	-0.763843	0.444961	0.813196	222.816		2.86485	0.00417212	0.0105774	1.777	*	Coefficient_of_variation_of_D151_C
A107	-0.498158	0.618372	0.852066	310.152		2.82858	0.00467547	0.0117168	2.027	*	actin_c_api_ratio
C118_A1B	1.69374	0.090315	0.378331	44.643		2.82858	0.00467547	0.0117168	2.027	*	Cell_size_ratio
C121	-0.298895	0.76502	0.906338	382.475		2.82858	0.00467547	0.0117168	2.027	*	medium_bud_ratio
D152_A1B	-1.36163	0.173314	0.554166	87.004		2.82858	0.00467547	0.0117168	2.027	*	Mobility_of_nucleus_in_mother
DCV180_C	0.697422	0.485539	0.818614	243.947		2.82858	0.00467547	0.0117168	2.027	*	Coefficient_of_variation_of_D180_C
ACV7-1_C	1.893	0.0583576	0.320888	28.2381		-2.79232	0.00523319	0.0130686	2.287	*	Coefficient_of_variation_of_A7-1_C
D193_C	-0.498158	0.618372	0.852066	310.152		-2.79232	0.00523319	0.0130686	2.287	*	Average_of_nuclear_brightness_in_whole_cell
ACV122_A	2.42437	0.0153349	0.149174	6.862		-2.75605	0.00585033	0.0148011	2.605	*	Coefficient_of_variation_of_A122_A
DCV118_A1B	-0.365316	0.714875	0.892416	356.967		2.71979	0.00653233	0.0164775	2.933	*	Coefficient_of_variation_of_D118_A1B
DCV14-1_A	-1.62732	0.10367	0.400481	50.861		-2.71979	0.00653233	0.0164775	2.933	*	Coefficient_of_variation_of_D14-1_A
CCV113_C	-0.298895	0.76502	0.906338	382.475		2.68353	0.00728502	0.0180055	3.295	*	Coefficient_of_variation_of_C113_C
D119_C	0.763843	0.444961	0.813196	222.816		-2.68353	0.00728502	0.0180055	3.295	*	Distance_between_nuclear_gravity_center_in_bud_and_bud_center
D146_C	-1.16237	0.245085	0.63481	123.788		-2.68353	0.00728502	0.0180055	3.295	*	Distance_between_nuclear_outline_point_D8_in_bud_and_bud_tip
D16-3_C	0.298895	0.76502	0.906338	382.475		-2.68353	0.00728502	0.0180055	3.295	*	Maximal_intensity_of_nuclear_brightness_in_whole_cell
DCV185_C	-0.166053	0.868115	0.950268	433.322		2.68353	0.00728502	0.0180055	3.295	*	Coefficient_of_variation_of_D185_C
C116_A1B	-0.963106	0.335494	0.712688	168.907		2.611	0.00902782	0.0220749	4.128	*	Axis_ratio_ratio
D14-1_C	-0.298895	0.76502	0.906338	382.475		2.611	0.00902782	0.0220749	4.128	*	Nuclear_size_in_mother
D17-2_C	-1.29521	0.195247	0.582006	98.359		2.611	0.00902782	0.0220749	4.128	*	Nuclear_fitness_for_ellipse_in_bud
D182_C	-0.963106	0.335494	0.712688	168.907		2.611	0.00902782	0.0220749	4.128	*	Nuclear_axis_ratio_in_mother
a Z indicates Z value of the Jonckheere-Terpstra test, where the positive and the negative indicate increase and decrease of the parameter values.
b P indicates P value of the Jonckheere-Terpstra test.
c Q indicates the false discovery rate at the threshold of P value.
d FP indicates the number of estimated false positives among the detected parameters at the threshold of a corresponding P value.
e Asterisk in Significant columun indicates the detected parameters.
